# Supplementary material for: Temporal trends in cardiovascular burden among patients with prostate cancer receiving androgen deprivation therapy: a population-based cohort study
Source: PubMed Central journal article supplement (PMC10241887; doi:10.1038/s41416-023-02271-5), 2023-04-19

## **SUPPLEMENTARY MATERIAL**

**Supplementary Table 1.** International Classification of Diseases, Ninth Revision (ICD-9) codes used to identify outcomes and co-morbidities.

All hereby listed codes include the corresponding sub-codes.

|                                       |        |       |        |        |       |       |       |       |       |       |       |       |       |       |
|---------------------------------------|--------|-------|--------|--------|-------|-------|-------|-------|-------|-------|-------|-------|-------|-------|
| Prostate cancer                       | 185    |       |        |        |       |       |       |       |       |       |       |       |       |       |
| Heart failure                         | 428    |       |        |        |       |       |       |       |       |       |       |       |       |       |
| Myocardial infarction                 | 410    |       |        |        |       |       |       |       |       |       |       |       |       |       |
| Diabetes mellitus                     | 250    |       |        |        |       |       |       |       |       |       |       |       |       |       |
| Hypertension                          | 401    | 402   | 403    | 404    | 405   | 437.2 |       |       |       |       |       |       |       |       |
| Atrial fibrillation                   | 427.31 |       |        |        |       |       |       |       |       |       |       |       |       |       |
| Stroke                                | 430    | 431   | 432    | 433    | 434   | 435   |       |       |       |       |       |       |       |       |
| Chronic obstructive pulmonary disease | 490    | 491   | 492    | 496.0  |       |       |       |       |       |       |       |       |       |       |
| Ischaemic heart disease               | 410    | 411   | 412    | 413    | 414   |       |       |       |       |       |       |       |       |       |
| Chronic kidney disease                | 582    | 585   | 586    |        |       |       |       |       |       |       |       |       |       |       |
| Chronic liver disease                 | 456.0  | 456.1 | 456.20 | 456.21 | 571   | 572.2 | 572.3 | 572.4 | 572.5 | 572.6 | 572.7 | 572.8 |       |       |
| Anaemia                               | 280    | 281   | 282    | 283    | 284.0 | 284.1 | 284.8 | 284.9 | 285   |       |       |       |       |       |
| Dyslipidaemia                         | 272.0  | 272.1 | 272.2  | 272.3  | 272.4 |       |       |       |       |       |       |       |       |       |
| Malignancy                            | 140    | 141   | 142    | 143    | 144   | 145   | 146   | 147   | 148   | 149   | 150   | 151   | 152   | 153   |
|                                       |        | 154   | 155    | 156    | 157   | 158   | 159   | 160   | 161   | 162   | 163   | 164   | 165   | 170   |
|                                       |        | 171   | 172    | 173    | 174   | 175   | 179   | 179   | 180   | 181   | 182   | 183   | 184   | 185   |
|                                       |        | 186   | 187    | 188    | 189   | 190   | 191   | 192   | 193   | 194   | 195   | 196   | 197   | 198   |
|                                       |        | 199   | 200    | 201    | 202   | 203   | 204   | 205   | 206   | 207   | 208   | 209.0 | 209.1 | 209.2 |
|                                       |        |       | 209.3  |        |       |       |       |       |       |       |       |       |       |       |

**Supplementary Table 2.** International Classification of Diseases, Ninth Revision (ICD-9) and Tenth Revision (ICD-10) codes used to identify the cause of death. All hereby listed codes include the corresponding sub-codes.

| Type of mortality        | ICD codes                         |
|--------------------------|-----------------------------------|
| Cardiovascular mortality | ICD-9: 390-438<br>ICD-10: I00-I79 |

**Supplementary Table 3.** Incidence rates of both outcomes without any restriction on the follow-up duration, stratified by the year of androgen deprivation therapy initiation. Incidence rate ratios displayed were referenced against the 1993-2000 group.

| Year of androgen deprivation therapy initiation | Major adverse cardiovascular events <sup>1</sup> |                            | All-cause mortality <sup>2</sup> |                            |
|-------------------------------------------------|--------------------------------------------------|----------------------------|----------------------------------|----------------------------|
|                                                 | Incidence rate <sup>3</sup>                      | Incidence rate ratio       | Incidence rate <sup>3</sup>      | Incidence rate ratio       |
| 1993-2000                                       | 4.1 [3.6, 4.6]                                   | 1 (reference)              | 16.2 [15.2, 17.2]                | 1 (reference)              |
| 2001-2007                                       | 5.0 [4.7, 5.4]                                   | 1.23 [1.06, 1.43], p=0.006 | 13.6 [13.1, 14.1]                | 0.84 [0.78, 0.91], p<0.001 |
| 2008-2014                                       | 5.5 [5.2, 5.9]                                   | 1.36 [1.18, 1.57], p<0.001 | 13.8 [13.3, 14.3]                | 0.85 [0.80, 0.92], p<0.001 |
| 2015-2021                                       | 5.7 [5.3, 6.2]                                   | 1.41 [1.21, 1.65], p<0.001 | 15.9 [15.2, 16.6]                | 0.98 [0.91, 1.06], p=0.660 |

<sup>1</sup> Log-linear test for trend p<0.001

<sup>2</sup> Log-linear test for trend p=0.168

<sup>3</sup> Per 100 person-year

**Supplementary Table 4.** Restricted mean survival time (in years) for both outcomes, stratified by the year of androgen deprivation therapy initiation. Follow-up duration was restricted to the longest follow-up duration observed in the 2015-2021 group.

| Year of androgen deprivation therapy initiation | Major adverse cardiovascular event | All-cause mortality |
|-------------------------------------------------|------------------------------------|---------------------|
| 1993-2000                                       | 5.86 [5.73, 6.00]                  | 3.55 [3.40, 3.70]   |
| 2001-2007                                       | 5.82 [5.74, 5.89]                  | 4.23 [4.14, 4.32]   |
| 2008-2014                                       | 5.64 [5.58, 5.71]                  | 4.36 [4.29, 4.43]   |
| 2015-2021                                       | 5.59 [5.51, 5.68]                  | 4.14 [4.06, 4.22]   |

**Supplementary Table 5.** Competing risk regression for major adverse cardiovascular event using the Fine and Gray sub-distribution model, with non-cardiovascular mortality as the competing event.

| Year of androgen deprivation therapy initiation | Sub-hazard ratio [95% confidence interval] | P value        |
|-------------------------------------------------|--------------------------------------------|----------------|
| 1993-2000                                       | 1 (reference)                              | Not applicable |
| 2001-2007                                       | 1.30 [1.09, 1.56]                          | 0.004          |
| 2008-2014                                       | 1.58 [1.33, 1.88]                          | <0.001         |
| 2015-2021                                       | 1.43 [1.19, 1.71]                          | <0.001         |

**Supplementary Table 6.** Results of backward stepwise Cox regression identifying the independent risk factors of major adverse cardiovascular event.

|                                                     | Hazard ratio [95% confidence interval] | P value |
|-----------------------------------------------------|----------------------------------------|---------|
| Age (per year)                                      | 1.05 [1.04, 1.05]                      | <0.001  |
| Diabetes mellitus                                   | 1.41 [1.24, 1.61]                      | <0.001  |
| Hypertension                                        | 1.18 [1.07, 1.30]                      | 0.001   |
| Anaemia                                             | 1.36 [1.16, 1.60]                      | <0.001  |
| Known malignancy                                    | 1.46 [1.29, 1.64]                      | <0.001  |
| Statin use                                          | 0.82 [0.72, 0.94]                      | 0.003   |
| Anticoagulant use                                   | 1.55 [1.24, 1.93]                      | <0.001  |
| Metformin use                                       | 0.74 [0.63, 0.87]                      | <0.001  |
| Number of cardiovascular medication (per drug item) | 1.17 [1.12, 1.21]                      | <0.001  |

**Supplementary Table 7.** Results of backward stepwise Cox regression identifying the independent risk factors of all-cause mortality.

|                                                     | Hazard ratio [95% confidence interval] | P value |
|-----------------------------------------------------|----------------------------------------|---------|
| Age (per year)                                      | 1.04 [1.03, 1.04]                      | <0.001  |
| Medical castration                                  | 0.83 [0.79, 0.87]                      | <0.001  |
| Prior chemotherapy                                  | 1.73 [1.20, 2.50]                      | 0.003   |
| Year of androgen deprivation therapy initiation     |                                        |         |
| 2001-2007                                           | 0.81 [0.75, 0.88]                      | <0.001  |
| 2008-2014                                           | 0.75 [0.70, 0.81]                      | <0.001  |
| 2015-2021                                           | 0.86 [0.78, 0.93]                      | 0.001   |
| Diabetes mellitus                                   | 1.24 [1.14, 1.36]                      | <0.001  |
| Insulin use                                         | 1.17 [1.06, 1.30]                      | 0.003   |
| Chronic kidney disease                              | 1.12 [1.00, 1.25]                      | 0.056   |
| Anaemia                                             | 1.63 [1.51, 1.76]                      | <0.001  |
| Atrial fibrillation                                 | 1.17 [1.06, 1.29]                      | 0.003   |
| Chronic liver disease                               | 1.49 [1.22, 1.82]                      | <0.001  |
| Chronic obstructive pulmonary disease               | 1.35 [1.24, 1.45]                      | <0.001  |
| Prior radiotherapy                                  | 1.17 [1.06, 1.31]                      | 0.003   |
| Statin use                                          | 0.91 [0.85, 0.98]                      | 0.015   |
| Known malignancy                                    | 2.04 [1.93, 2.17]                      | <0.001  |
| Prior radical prostatectomy                         | 0.92 [0.88, 0.97]                      | 0.001   |
| ACEI/ARB use                                        | 0.93 [0.87, 0.99]                      | 0.023   |
| Metformin use                                       | 0.60 [0.54, 0.66]                      | <0.001  |
| Sulphonylurea use                                   | 1.13 [1.03, 1.24]                      | 0.013   |
| Number of cardiovascular medication (per drug item) | 1.06 [1.03, 1.08]                      | <0.001  |

ACEI, angiotensinogen-converting enzyme inhibitor. ARB, angiotensin receptor blocker.

**Supplementary Figure 1.** Kaplan-Meier curve showing the cumulative incidence of major adverse cardiovascular event (MACE) without any restriction on the follow-up duration. ADT, androgen deprivation therapy.

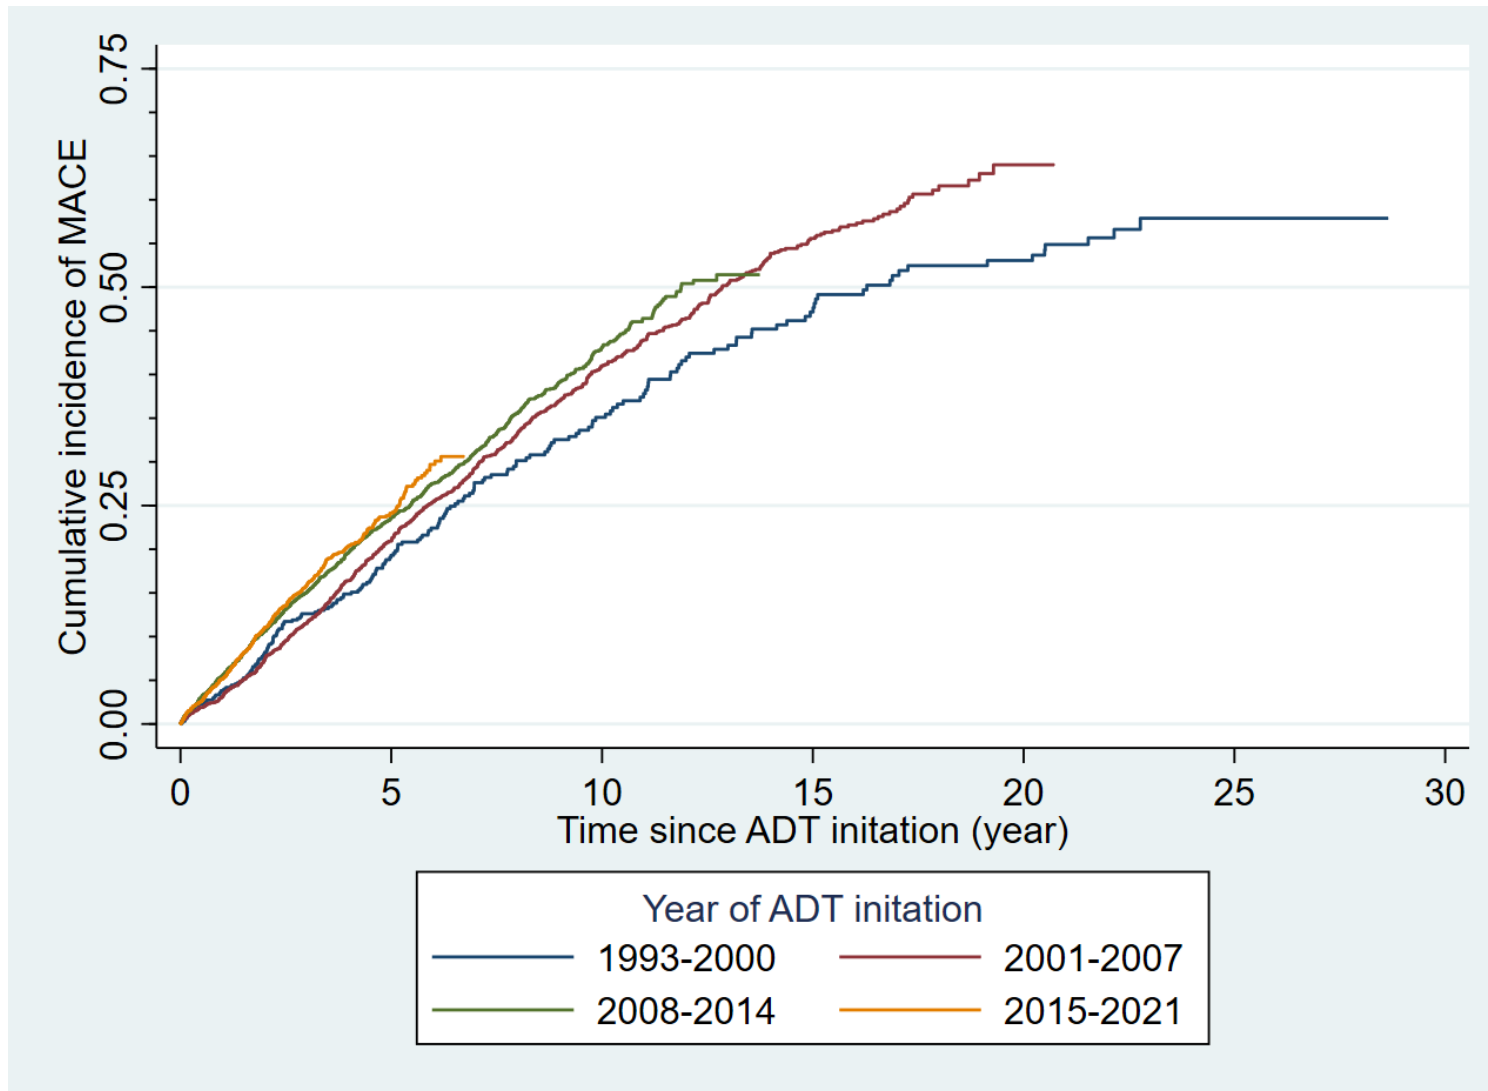

**Supplementary Figure 2.** Kaplan-Meier curve showing the cumulative incidence of all-cause mortality without any restriction on the follow-up duration. ADT, androgen deprivation therapy.

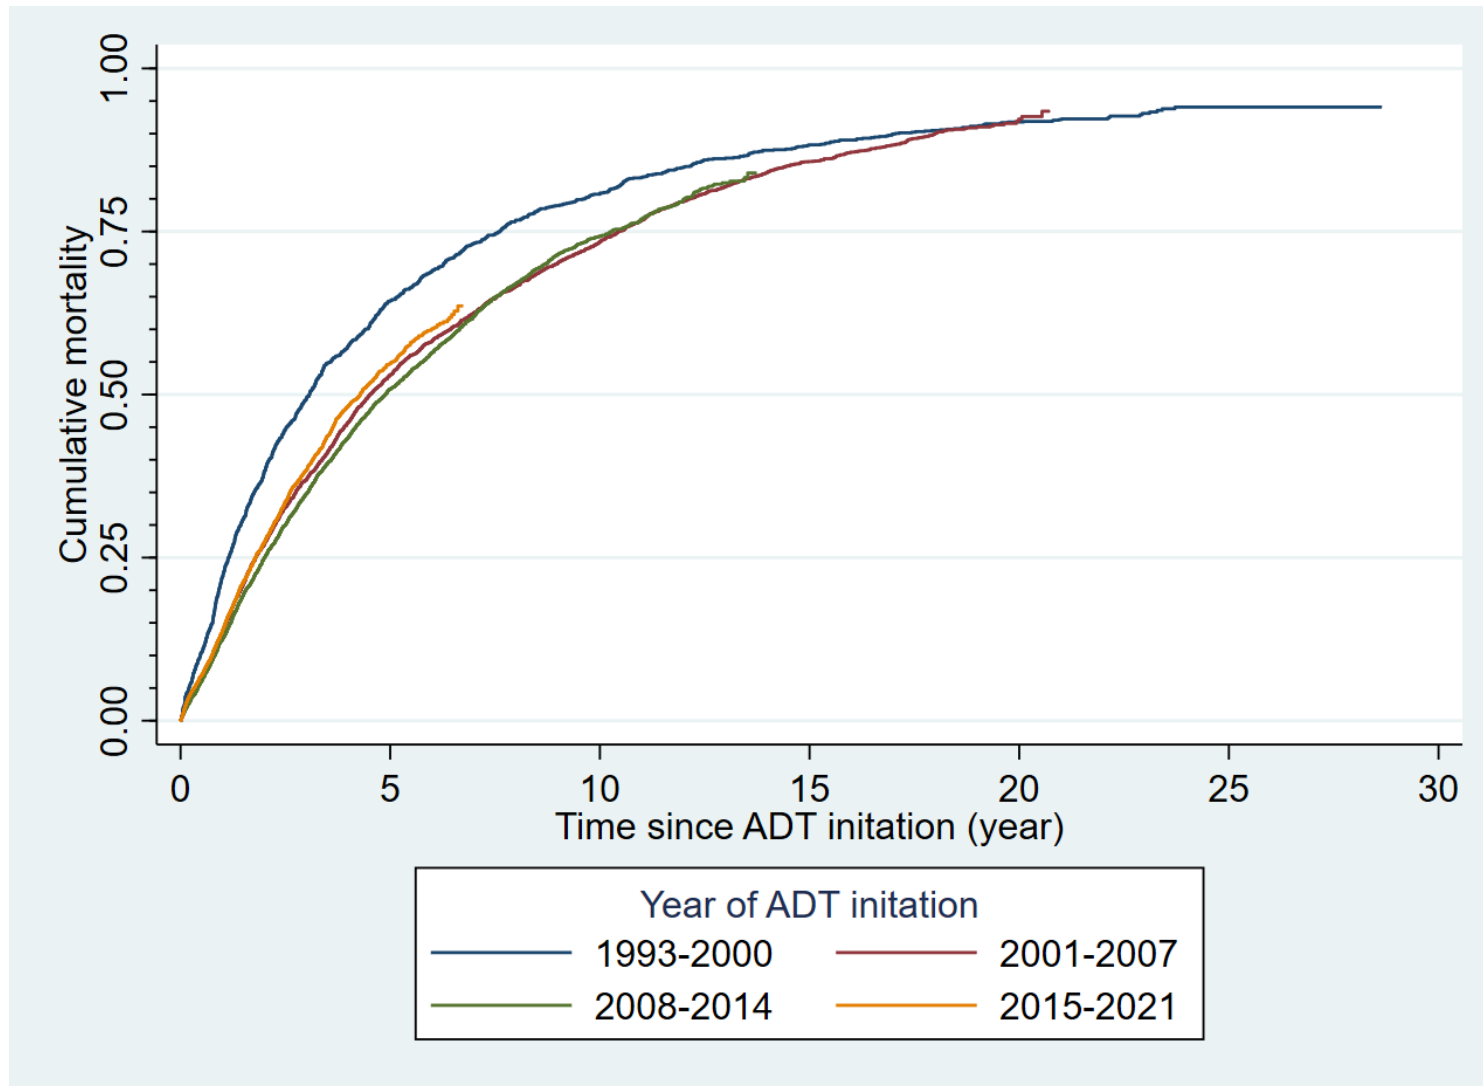

Supplement: 41416_2023_2271_MOESM1_ESM.pdf [file 41416_2023_2271_MOESM1_ESM.pdf]
